# Supplementary material for: Field evidence of bird poisonings by imidacloprid-treated seeds: a review of incidents reported by the French SAGIR network from 1995 to 2014
Source: PubMed Central journal article supplement (PMC5352772; doi:10.1007/s11356-016-8272-y), 2016-12-27
Supplement: 11356_2016_8272_MOESM1_ESM.pdf [file 11356_2016_8272_MOESM1_ESM.pdf]

**Online Resource.** Detail of incidents reported by the French SAGIR Network from the 1st January 1995 to the 31st December 2014 for which toxicological analyses detected imidacloprid residues (All the concentrations are given in mg/kg; “< LoD” means below the limit of detection; “positive” means that residues were detected but concentrations were not reported ; a: Black-headed Gull (*Chroicocephalus ridibundus*), Brown hare (*Lepus europaeus*), Common crane (*Grus grus*), Common starling (*Sturnus vulgaris*), Eurasian collared dove (*Streptopelia decaocto*), Feral/rock pigeon (*Columba livia*), Grey partridge (*Perdix perdix*), Partridge sp. (*Alectoris rufa* or *Perdix perdix* not specified), Pigeon sp. (*Columba palumbus*, *C. livia* or, *C. oenas* not specified), Red-legged partridge (*Alectoris rufa*), Ring-necked pheasant (*Phasianus colchicus*), Stock dove (*Columba oenas*), Wood-pigeon (*Columba palumbus*) ; b: When the same matrix were not analysed for all the individuals of the same incident number of analysed animals for each category of matrix is given in brackets, for the 2 cases “matrix not specified” and the case “seeds” detected concentration is given in brackets ; c: When residue analysis results are the same for several animals the number of individuals is given in brackets).

| Year | Month    | Cluster | Species <sup>a</sup> | Number of dead animals | Kind of habitat at the discovery site    | Nervous disorders       | Number of collected animals | Dressed seeds in crop/gizzard content (type of seeds) | Type of residue analyses | Number of animals analysed for imidacloprid residues | Analysed matrix <sup>b</sup> | Imidacloprid concentration in Crop/gizzard content <sup>c</sup> | Imidacloprid concentration in liver <sup>c</sup> | Other searched substances             | Other active substance detected (analysed matrix; detected concentration) | Responses to the diagnostic approach to estimate the degree of certainty that mortalities are due to imidacloprid-treated seeds poisoning and degree of certitude (see Fig 1. and "Results" section) |                                                       |                                                                                       |                     |
|------|----------|---------|----------------------|------------------------|------------------------------------------|-------------------------|-----------------------------|-------------------------------------------------------|--------------------------|------------------------------------------------------|------------------------------|-----------------------------------------------------------------|--------------------------------------------------|---------------------------------------|---------------------------------------------------------------------------|------------------------------------------------------------------------------------------------------------------------------------------------------------------------------------------------------|-------------------------------------------------------|---------------------------------------------------------------------------------------|---------------------|
|      |          |         |                      |                        |                                          |                         |                             |                                                       |                          |                                                      |                              |                                                                 |                                                  |                                       |                                                                           | Question 1 Exposure assessment                                                                                                                                                                       | Question 2 Epidemiological relevance and credibility? | Question 3 pathologic relevance ?                                                     | Degree of Certitude |
| 1995 | October  | No      | Ring-necked pheasant | 1                      | Crops (plant growth stage not specified) | Yes (fall in flight)    | 1                           | Yes (Not specified)                                   | Individual               | 1                                                    | Crop/gizzard                 | 10.3                                                            | -                                                | No                                    | -                                                                         | a : Proved (imidacloprid residues detected in digestive tract)                                                                                                                                       | b : Low (Single animal incident)                      | a : Strong (nervous disorders observed)                                               | Likely              |
| 1995 | October  | Yes     | Grey partridge       | 4                      | Crops (sowing)                           | No                      | 4                           | Yes (Not specified)                                   | Individual               | 4                                                    | Crop/gizzard                 | 2.2 ; 4.5 ; 4.4 ; 6.1                                           | -                                                | No                                    | -                                                                         | a : Proved (imidacloprid residues detected in digestive tract)                                                                                                                                       | a : Strong (Cluster found in crops)                   | b : Low (Neither nervous disorders observed nor liver imidacloprid residues detected) | Likely              |
| 1995 | October  | No      | Grey partridge       | 1                      | Crops (sowing)                           | Yes (ataxia)            | 1                           | Yes (Cereals)                                         | Individual               | 1                                                    | Crop/gizzard                 | 26.6                                                            | -                                                | Yes (anticoagulants)                  | No                                                                        | a : Proved (imidacloprid residues detected in digestive tract)                                                                                                                                       | b : Low (Single animal incident)                      | a : Strong (nervous disorders observed)                                               | Likely              |
| 1995 | October  | Yes     | Grey partridge       | 3                      | Crops (sowing)                           | No                      | 3                           | Yes (Cereals)                                         | Individual               | 3                                                    | Crop/gizzard & liver         | 5.1 ; 27.8 ; 38.6                                               | 1.0 ; 1.0 ; 1.0                                  | No                                    | -                                                                         | a : Proved (imidacloprid residues detected in digestive tract and liver)                                                                                                                             | a : Strong (Cluster found in crops)                   | a : Strong (imidacloprid concentration in liver ≥ 1mg/kg)                             | Very likely         |
| 1995 | October  | No      | Red-legged partridge | 1                      | Crops (plant growth stage not specified) | Yes (nervous disorders) | 1                           | No                                                    | Individual               | 1                                                    | Crop/gizzard                 | 2.5                                                             | -                                                | Yes (acetylcholinesterase inhibitors) | No                                                                        | a : Proved (imidacloprid residues detected in digestive tract)                                                                                                                                       | b : Low (Single animal incident)                      | a : Strong (nervous disorders observed)                                               | Likely              |
| 1995 | October  | No      | Grey partridge       | 1                      | Crops (plant growth stage not specified) | No                      | 1                           | No                                                    | Individual               | 1                                                    | Crop/gizzard                 | 3.1                                                             | -                                                | Yes (acetylcholinesterase inhibitors) | No                                                                        | a : Proved (imidacloprid residues detected in digestive tract)                                                                                                                                       | b : Low (Single animal incident)                      | b : Low (Neither nervous disorders observed nor liver imidacloprid residues detected) | Possible            |
| 1995 | October  | Yes     | Grey partridge       | 3                      | Crops (plant growth stage not specified) | No                      | 3                           | Yes (Cereals)                                         | Individual               | 1                                                    | Crop/gizzard                 | 5.8                                                             | -                                                | No                                    | -                                                                         | a : Proved (imidacloprid residues detected in digestive tract)                                                                                                                                       | a : Strong (Cluster found in crops)                   | b : Low (Neither nervous disorders observed nor liver imidacloprid residues detected) | Likely              |
| 1995 | November | No      | Grey partridge       | 1                      | Crops (plant growth stage not specified) | No                      | 1                           | No                                                    | Individual               | 1                                                    | Crop/gizzard                 | 0.9                                                             | -                                                | Yes (acetylcholinesterase inhibitors) | No                                                                        | a : Proved (imidacloprid residues detected in digestive tract)                                                                                                                                       | b : Low (Single animal incident)                      | b : Low (Neither nervous disorders observed nor liver imidacloprid residues detected) | Possible            |
| 1995 | November | No      | Grey partridge       | 1                      | Crops (plant growth stage not specified) | No                      | 1                           | No                                                    | Individual               | 1                                                    | Crop/gizzard                 | 13.2                                                            | -                                                | Yes (acetylcholinesterase inhibitors) | No                                                                        | a : Proved (imidacloprid residues detected in digestive tract)                                                                                                                                       | b : Low (Single animal incident)                      | b : Low (Neither nervous disorders observed nor liver imidacloprid residues detected) | Possible            |

|      |          |     |                      |    |                                          |                         |   |                     |                     |   |                                     |                                  |                             |                                                                                     |                                                         |                                                                          |                                         |                                                                                        |             |
|------|----------|-----|----------------------|----|------------------------------------------|-------------------------|---|---------------------|---------------------|---|-------------------------------------|----------------------------------|-----------------------------|-------------------------------------------------------------------------------------|---------------------------------------------------------|--------------------------------------------------------------------------|-----------------------------------------|----------------------------------------------------------------------------------------|-------------|
| 1996 | March    | Yes | Rock/Feral pigeon    | 10 | Other than crops (human activity area)   | Yes (paralysis)         | 1 | Yes (Cereals)       | Individual          | 1 | Crop/gizzard                        | 0.6                              | -                           | Yes (acetylcholinesterase inhibitors)                                               | Acetylcholinesterase inhibitor (Crop/gizzard; positive) | a : Proved (imidacloprid residues detected in digestive tract)           | b : Low (Cluster but not found in crop) | b : Low (other pesticides residue detected)                                            | Possible    |
| 1996 | March    | No  | Grey partridge       | 1  | Crops (sowing)                           | Yes (fall in flight)    | 1 | Yes (Cereals)       | Individual          | 1 | Crop/gizzard                        | 9.5                              | -                           | No                                                                                  | -                                                       | a : Proved (imidacloprid residues detected in digestive tract)           | b : Low (Single animal incident)        | a : Strong (nervous disorders observed)                                                | Likely      |
| 1996 | April    | No  | Grey partridge       | 1  | Crops (plant growth stage not specified) | No                      | 1 | No                  | Individual          | 1 | Crop/gizzard & liver                | 1.2                              | < LoD                       | Yes (anticoagulants)                                                                | No                                                      | a : Proved (imidacloprid residues detected in digestive tract)           | b : Low (Single animal incident)        | b : Low (Neither nervous disorders observed nor liver imidacloprid residues detected)  | Possible    |
| 1996 | May      | Yes | Rock/Feral pigeon    | 7  | Other than crops (human activity area)   | No                      | 5 | Yes (Maize)         | Individual          | 5 | Crop/gizzard & liver (1); liver (4) | 39.7                             | 1.1 ; 1.4 ; 0.6 ; <LoD (2)  | Yes (acetylcholinesterase inhibitors; alphachloralose)                              | No                                                      | a : Proved (imidacloprid residues detected in digestive tract and liver) | b : Low (Cluster but not found in crop) | a : Strong (imidacloprid concentration in liver ≥ 1mg/kg)                              | Likely      |
| 1996 | October  | Yes | Grey partridge       | 2  | Crops (sowing)                           | No                      | 2 | Yes (Cereals)       | Individual          | 2 | Crop/gizzard & liver                | 16.4 ; 17.0                      | 0.6 ; 1.2                   | Yes (acetylcholinesterase inhibitors)                                               | No                                                      | a : Proved (imidacloprid residues detected in digestive tract and liver) | a : Strong (Cluster found in crops)     | a : Strong (imidacloprid concentration in liver ≥ 1mg/kg)                              | Very likely |
| 1996 | October  | No  | Grey partridge       | 1  | Crops (sowing)                           | No                      | 1 | Yes (Cereals)       | Individual          | 1 | Crop/gizzard & liver                | 3.1                              | < LoD                       | Yes (acetylcholinesterase inhibitors)                                               | No                                                      | a : Proved (imidacloprid residues detected in digestive tract)           | b : Low (Single animal incident)        | b : Low (Neither nervous disorders observed nor liver imidacloprid residues detected)  | Possible    |
| 1996 | October  | Yes | Brown hare           | 2  | Crops (sowing)                           | No                      | 2 | No                  | Individual          | 2 | Liver                               | -                                | 4.8 ; 7.2                   | No                                                                                  | -                                                       | a : Proved (imidacloprid residues detected in liver)                     | a : Strong (Cluster found in crops)     | a : Strong (imidacloprid concentration in liver ≥ 1mg/kg)                              | Very likely |
| 1996 | October  | No  | Ring-necked pheasant | 1  | Not specified                            | No                      | 1 | No                  | Individual          | 1 | Crop/gizzard & liver                | 1.0                              | 0.3                         | Yes (acetylcholinesterase inhibitors; alphachloralose; organochlorins; pyrethroids) | No                                                      | a : Proved (imidacloprid residues detected in digestive tract and liver) | b : Low (Single animal incident)        | b : Low (No nervous disorders observed & imidacloprid concentration in liver ≤ 1mg/kg) | Possible    |
| 1996 | November | Yes | Pigeon sp.           | 2  | Other than crops (human activity area)   | Yes (paralysis)         | 2 | Yes (Not specified) | Pool of individuals | - | Crop/gizzard                        | 2.0                              | -                           | Yes (alphachloralose)                                                               | No                                                      | a : Proved (imidacloprid residues detected in digestive tract)           | b : Low (Cluster but not found in crop) | a : Strong (nervous disorders observed)                                                | Likely      |
| 1997 | March    | Yes | Wood-pigeon          | 5  | Crops (sowing)                           | No                      | 5 | Yes (Cereals)       | Individual          | 2 | Crop/gizzard & liver (1); liver (1) | 11.5                             | 0.5 ; < LoD                 | Yes (acetylcholinesterase inhibitors)                                               | Furathiocarb (Crop/gizzard; 18.0 ; 12.0)                | a : Proved (imidacloprid residues detected in digestive tract and liver) | a : Strong (Cluster found in crops)     | b : Low (other pesticides residue detected)                                            | Likely      |
| 1998 | October  | Yes | Rock/Feral pigeon    | 30 | Not specified                            | No                      | 5 | No                  | Individual          | 5 | Crop/gizzard & liver                | 18.0 ; 28.0 ; 15.6 ; 19.0 ; 18.0 | 2.0 ; 0.6 ; 1.0 ; < LoD (2) | No                                                                                  | -                                                       | a : Proved (imidacloprid residues detected in digestive tract and liver) | b : Low (Cluster but not found in crop) | a : Strong (imidacloprid concentration in liver ≥ 1mg/kg)                              | Likely      |
| 1998 | October  | Yes | Rock/Feral pigeon    | 3  | Other than crops (human activity area)   | Yes (nervous disorders) | 3 | No                  | Individual          | 3 | Crop/gizzard                        | 15.3 ; 15.5 ; 9.2                | -                           | No                                                                                  | -                                                       | a : Proved (imidacloprid residues detected in digestive tract)           | b : Low (Cluster but not found in crop) | a : Strong (nervous disorders observed)                                                | Likely      |

|      |          |     |                   |   |                                          |                                 |   |               |                     |   |                                            |                                    |           |                                       |                                                                     |                                                                                |                                         |                                                                                        |             |
|------|----------|-----|-------------------|---|------------------------------------------|---------------------------------|---|---------------|---------------------|---|--------------------------------------------|------------------------------------|-----------|---------------------------------------|---------------------------------------------------------------------|--------------------------------------------------------------------------------|-----------------------------------------|----------------------------------------------------------------------------------------|-------------|
| 1998 | October  | Yes | Grey partridge    | 3 | Crops (sowing)                           | No                              | 3 | No            | Individual          | 3 | Crop/gizzard & liver                       | 33.0 ; 8.8 ; 22.5                  | < LoD (3) | No                                    | -                                                                   | a : Proved (imidacloprid residues detected in digestive tract)                 | a : Strong (Cluster found in crops)     | b : Low (Neither nervous disorders observed nor liver imidacloprid residues detected)  | Likely      |
| 1998 | November | Yes | Grey partridge    | 5 | Crops (plant growth stage not specified) | No                              | 5 | Yes (Cereals) | Individual          | 5 | Crop/gizzard & liver                       | 21.6 ; 17.8 ; 19.3 ; 1706.0 ; 17.5 | < LoD (5) | No                                    | -                                                                   | a : Proved (imidacloprid residues detected in digestive tract)                 | a : Strong (Cluster found in crops)     | b : Low (Neither nervous disorders observed nor liver imidacloprid residues detected)  | Likely      |
| 1998 | December | Yes | Rock/Feral pigeon | 3 | Other than crops (human activity area)   | Yes (paralysis & red droppings) | 3 | No            | Pool of individuals | - | Crop/gizzard                               | 1.2                                | -         | No                                    | -                                                                   | a : Proved (imidacloprid residues detected in digestive tract)                 | b : Low (Cluster but not found in crop) | a : Strong (nervous disorders observed)                                                | Likely      |
| 1999 | May      | No  | Partridge sp.     | 1 | Crops (plant growth stage not specified) | No                              | 1 | Yes (Maize)   | Individual          | 1 | Not specified (positive)                   | -                                  | -         | No                                    | -                                                                   | b : Strongly suspected imidacloprid residues detected but matrix not specified | b : Low (Single animal incident)        | b : Low (Neither nervous disorders observed nor liver imidacloprid residues detected)  | Possible    |
| 1999 | October  | Yes | Grey partridge    | 2 | Crops (plant growth stage not specified) | No                              | 1 | No            | Individual          | 1 | Crop/gizzard & liver                       | 47.0                               | 15.0      | No                                    | -                                                                   | a : Proved (imidacloprid residues detected in digestive tract and liver)       | a : Strong (Cluster found in crops)     | a : Strong (imidacloprid concentration in liver ≥ 1mg/kg)                              | Very likely |
| 1999 | October  | Yes | Partridge sp.     | 6 | Crops (sowing)                           | No                              | 6 | Yes (Cereals) | Individual          | 6 | Crop/gizzard (5); Crop/gizzard & liver (1) | 2.6 ; 4.7 ; 3.4 ; 4.0 ; 4.0 ; <LoD | < LoD     | Yes (fipronil)                        | Fipronil (Crop/gizzard; 87.0 ; 107.0 ; 88.0 ; 81.6 ; < LoD ; < LoD) | a : Proved (imidacloprid residues detected in digestive tract)                 | a : Strong (Cluster found in crops)     | b : Low (other pesticides residue detected)                                            | Likely      |
| 2000 | February | Yes | Wood-pigeon       | 2 | Other than crops (semi-natural area)     | Yes (nervous disorders)         | 2 | No            | Individual          | 2 | Crop/gizzard                               | 1.2 ; 1.9                          | -         | No                                    | -                                                                   | a : Proved (imidacloprid residues detected in digestive tract)                 | b : Low (Cluster but not found in crop) | a : Strong (nervous disorders observed)                                                | Likely      |
| 2000 | March    | No  | Grey partridge    | 1 | Crops (plant growth stage not specified) | No                              | 1 | No            | Individual          | 1 | Crop/gizzard & liver                       | 5.3                                | < LoD     | Yes (acetylcholinesterase inhibitors) | No                                                                  | a : Proved (imidacloprid residues detected in digestive tract)                 | b : Low (Single animal incident)        | b : Low (Neither nervous disorders observed nor liver imidacloprid residues detected)  | Possible    |
| 2000 | March    | No  | Wood-pigeon       | 1 | Other than crops (semi-natural area)     | No                              | 1 | No            | Individual          | 1 | Crop/gizzard & liver                       | 0.4                                | 0.3       | No                                    | -                                                                   | a : Proved (imidacloprid residues detected in digestive tract and liver)       | b : Low (Single animal incident)        | b : Low (No nervous disorders observed & imidacloprid concentration in liver ≤ 1mg/kg) | Possible    |
| 2000 | March    | No  | Rock/Feral pigeon | 1 | Crops (plant growth stage not specified) | No                              | 1 | No            | Individual          | 1 | Crop/gizzard                               | 2.2                                | -         | Yes (acetylcholinesterase inhibitors) | No                                                                  | a : Proved (imidacloprid residues detected in digestive tract)                 | b : Low (Single animal incident)        | b : Low (Neither nervous disorders observed nor liver imidacloprid residues detected)  | Possible    |
| 2000 | April    | No  | Grey partridge    | 1 | Crops (sowing)                           | No                              | 1 | Yes (Maize)   | Individual          | 1 | Crop/gizzard & liver                       | 15.0                               | < LoD     | No                                    | -                                                                   | a : Proved (imidacloprid residues detected in digestive tract)                 | b : Low (Single animal incident)        | b : Low (Neither nervous disorders observed nor liver imidacloprid residues detected)  | Possible    |
| 2000 | April    | No  | Grey partridge    | 1 | Crops (plant growth stage not specified) | No                              | 1 | No            | Individual          | 1 | Crop/gizzard & liver                       | < LoD                              | 12.0      | Yes (acetylcholinesterase inhibitors) | Acetylcholinest erase inhibitor (Crop/gizzard; 20.0)                | a : Proved (imidacloprid residues detected in liver)                           | b : Low (Single animal incident)        | b : Low (other pesticides residue detected)                                            | Possible    |
| 2000 | May      | No  | Wood-pigeon       | 1 | Not specified                            | No                              | 1 | No            | Individual          | 1 | Crop/gizzard                               | 5.1                                | -         | Yes (acetylcholinesterase inhibitors) | No                                                                  | a : Proved (imidacloprid residues detected in digestive tract)                 | b : Low (Single animal incident)        | b : Low (Neither nervous disorders observed nor liver imidacloprid residues)           | Possible    |

|      |          |     |                      |    |                                          |                         |    |                     |                     |   |                      |                   |                  |                                                 |                                                         |                                                                          |                                         |                                                                                       |             |
|------|----------|-----|----------------------|----|------------------------------------------|-------------------------|----|---------------------|---------------------|---|----------------------|-------------------|------------------|-------------------------------------------------|---------------------------------------------------------|--------------------------------------------------------------------------|-----------------------------------------|---------------------------------------------------------------------------------------|-------------|
|      |          |     |                      |    |                                          |                         |    |                     |                     |   |                      |                   |                  |                                                 |                                                         |                                                                          |                                         | detected)                                                                             |             |
| 2001 | October  | No  | Red-legged partridge | 1  | Crops (plant growth stage not specified) | No                      | 1  | No                  | Individual          | 1 | Crop/gizzard         | 0.9               | -                | No                                              | -                                                       | a : Proved (imidacloprid residues detected in digestive tract)           | b : Low (Single animal incident)        | b : Low (Neither nervous disorders observed nor liver imidacloprid residues detected) | Possible    |
| 2002 | March    | Yes | Rock/Feral pigeon    | 5  | Other than crops (human activity area)   | No                      | 5  | Yes (Cereals)       | Pool of individuals | - | Crop/gizzard         | 7.1               | -                | Yes (acetylcholinesterase inhibitors)           | Acetylcholinesterase inhibitor (Crop/gizzard; positive) | a : Proved (imidacloprid residues detected in digestive tract)           | b : Low (Cluster but not found in crop) | b : Low (other pesticides residue detected)                                           | Possible    |
| 2002 | April    | Yes | Rock/Feral pigeon    | 20 | Crops (plant growth stage not specified) | No                      | 5  | No                  | Pool of individuals | - | Crop/gizzard         | 16.2              | -                | Yes (acetylcholinesterase inhibitors; fipronil) | Acetylcholinesterase inhibitor (Crop/gizzard; positive) | a : Proved (imidacloprid residues detected in digestive tract)           | a : Strong (Cluster found in crops)     | b : Low (other pesticides residue detected)                                           | Likely      |
| 2002 | October  | Yes | Grey partridge       | 3  | Crops (plant growth stage not specified) | Yes (nervous disorders) | 3  | Yes (Cereals)       | Pool of individuals | - | Crop/gizzard         | 9.7               | -                | Yes (anticoagulants)                            | No                                                      | a : Proved (imidacloprid residues detected in digestive tract)           | a : Strong (Cluster found in crops)     | a : Strong (nervous disorders observed)                                               | Very likely |
| 2003 | October  | Yes | Grey partridge       | 2  | Crops (sowing)                           | No                      | 2  | Yes (Cereals)       | Pool of individuals | - | Crop/gizzard         | 7.8               | -                | Yes (fipronil)                                  | Fipronil (Crop/gizzard; 7.3)                            | a : Proved (imidacloprid residues detected in digestive tract)           | a : Strong (Cluster found in crops)     | b : Low (other pesticides residue detected)                                           | Likely      |
| 2003 | October  | Yes | Grey partridge       | 12 | Crops (plant growth stage not specified) | No                      | 12 | Yes (Not specified) | Pool of individuals | - | Crop/gizzard         | 37.3              | -                | No                                              | -                                                       | a : Proved (imidacloprid residues detected in digestive tract)           | a : Strong (Cluster found in crops)     | b : Low (Neither nervous disorders observed nor liver imidacloprid residues detected) | Likely      |
| 2003 | November | Yes | Rock/Feral pigeon    | 60 | Crops (sowing)                           | No                      | 2  | Yes (Cereals)       | Pool of individuals | - | Crop/gizzard         | 11.7              | -                | No                                              | -                                                       | a : Proved (imidacloprid residues detected in digestive tract)           | a : Strong (Cluster found in crops)     | b : Low (Neither nervous disorders observed nor liver imidacloprid residues detected) | Likely      |
| 2004 | April    | Yes | Pigeon sp.           | 2  | Crops (sowing)                           | No                      | 2  | No                  | Individual          | 2 | Crop/gizzard         | 8.8 ; 9.7         | -                | No                                              | -                                                       | a : Proved (imidacloprid residues detected in digestive tract)           | a : Strong (Cluster found in crops)     | b : Low (Neither nervous disorders observed nor liver imidacloprid residues detected) | Likely      |
| 2004 | April    | Yes | Rock/Feral pigeon    | 10 | Crops (sowing)                           | No                      | 3  | No                  | Individual          | 3 | Crop/gizzard & liver | 10.6 ; 12.0 ; 9.0 | < LoD (2) ; 43.5 | No                                              | -                                                       | a : Proved (imidacloprid residues detected in digestive tract and liver) | a : Strong (Cluster found in crops)     | a : Strong (imidacloprid concentration in liver ≥ 1mg/kg)                             | Very likely |
| 2004 | May      | No  | Rock/Feral pigeon    | 1  | Other than crops (human activity area)   | Yes (nervous disorders) | 1  | Yes (Maize)         | Individual          | 1 | Crop/gizzard & liver | 8.3               | < LoD            | Yes (alphachloralose; fipronil)                 | No                                                      | a : Proved (imidacloprid residues detected in digestive tract)           | b : Low (Single animal incident)        | a : Strong (nervous disorders observed)                                               | Likely      |
| 2004 | May      | No  | Grey partridge       | 1  | Crops (sowing)                           | Yes (nervous disorders) | 1  | Yes (Maize)         | Individual          | 1 | Crop/gizzard & liver | 18.0              | < LoD            | No                                              | -                                                       | a : Proved (imidacloprid residues detected in digestive tract)           | b : Low (Single animal incident)        | a : Strong (nervous disorders observed)                                               | Likely      |
| 2004 | May      | Yes | Wood-pigeon          | 3  | Other than crops (semi-natural area)     | Yes (fall in flight)    | 1  | No                  | Individual          | 1 | Crop/gizzard         | 39.5              | -                | Yes (alphachloralose)                           | No                                                      | a : Proved (imidacloprid residues detected in digestive tract)           | b : Low (Cluster but not found in crop) | a : Strong (nervous disorders observed)                                               | Likely      |
| 2004 | October  | Yes | Grey partridge       | 3  | Crops (sowing)                           | Yes (inability to fly)  | 3  | Yes (Cereals)       | Pool of individuals | - | Crop/gizzard & liver | 8.8               | < LoD            | No                                              | -                                                       | a : Proved (imidacloprid residues detected in                            | a : Strong (Cluster found in crops)     | a : Strong (nervous disorders observed)                                               | Very likely |

|      |          |     |                   |     |                                          |                                                              |   |                     |                     |   |                      |                 |                 |                                                 |                                                         |                                                                          |                                         |                                                                                        |             |  |
|------|----------|-----|-------------------|-----|------------------------------------------|--------------------------------------------------------------|---|---------------------|---------------------|---|----------------------|-----------------|-----------------|-------------------------------------------------|---------------------------------------------------------|--------------------------------------------------------------------------|-----------------------------------------|----------------------------------------------------------------------------------------|-------------|--|
|      |          |     |                   |     |                                          |                                                              |   |                     |                     |   |                      |                 |                 |                                                 |                                                         | digestive tract)                                                         |                                         |                                                                                        |             |  |
| 2004 | November | No  | Grey partridge    | 1   | Not specified                            | Yes (nervous disorders)                                      | 1 | Yes (Cereals)       | Individual          | 1 | Crop/gizzard & liver | 6.0             | < LoD           | Yes (anticoagulants)                            | No                                                      | a : Proved (imidacloprid residues detected in digestive tract)           | b : Low (Single animal incident)        | a : Strong (nervous disorders observed)                                                | Likely      |  |
| 2005 | October  | Yes | Rock/Feral pigeon | 100 | Not specified                            | Yes (nervous disorders)                                      | 1 | Yes (Cereals)       | Individual          | 1 | Crop/gizzard         | 36.7            | -               | Yes (alphachloralose)                           | No                                                      | a : Proved (imidacloprid residues detected in digestive tract)           | b : Low (Cluster but not found in crop) | a : Strong (nervous disorders observed)                                                | Likely      |  |
| 2005 | October  | Yes | Grey partridge    | 4   | Crops (plant growth stage not specified) | Yes (nervous disorders ; One bird released safe after ~12h ) | 3 | No                  | Individual          | 3 | Crop/gizzard & liver | 6.9 ; < LoD (2) | 7.6 ; 8.5 ; 4.8 | No                                              | -                                                       | a : Proved (imidacloprid residues detected in digestive tract and liver) | a : Strong (Cluster found in crops)     | a : Strong (nervous disorders observed & imidacloprid concentration in liver ≥ 1mg/kg) | Very likely |  |
| 2005 | October  | Yes | Grey partridge    | 2   | Crops (plant growth stage not specified) | No                                                           | 2 | Yes (Cereals)       | Pool of individuals | - | Crop/gizzard         | 11.5            | -               | Yes (acetylcholinesterase inhibitors; fipronil) | Acetylcholinesterase inhibitor (Crop/gizzard; positive) | a : Proved (imidacloprid residues detected in digestive tract)           | a : Strong (Cluster found in crops)     | b : Low (other pesticides residue detected)                                            | Likely      |  |
| 2005 | October  | Yes | Rock/Feral pigeon | 3   | Other than crops (human activity area)   | No                                                           | 1 | No                  | Individual          | 1 | Crop/gizzard & liver | 9.1             | < LoD           | No                                              | -                                                       | a : Proved (imidacloprid residues detected in digestive tract)           | b : Low (Cluster but not found in crop) | b : Low (Neither nervous disorders observed nor liver imidacloprid residues detected)  | Possible    |  |
| 2005 | November | Yes | Pigeon sp.        | 6   | Other than crops (human activity area)   | No                                                           | 3 | Yes (Cereals)       | Pool of individuals | - | Crop/gizzard & liver | 7.7             | < LoD           | Yes (alphachloralose)                           | Alphachloralose (Crop/gizzard; 64.5)                    | a : Proved (imidacloprid residues detected in digestive tract)           | b : Low (Cluster but not found in crop) | b : Low (other pesticides residue detected)                                            | Possible    |  |
| 2006 | October  | Yes | Rock/Feral pigeon | 5   | Other than crops (human activity area)   | No                                                           | 1 | Yes (Cereals)       | Individual          | 1 | Crop/gizzard         | 16.2            | -               | Yes (alphachloralose)                           | No                                                      | a : Proved (imidacloprid residues detected in digestive tract)           | b : Low (Cluster but not found in crop) | b : Low (Neither nervous disorders observed nor liver imidacloprid residues detected)  | Possible    |  |
| 2007 | October  | Yes | Grey partridge    | 2   | Crops (plant growth stage not specified) | Yes (nervous disorders)                                      | 2 | Yes (Cereals)       | Pool of individuals | - | Crop/gizzard         | 115.0           | -               | No                                              | -                                                       | a : Proved (imidacloprid residues detected in digestive tract)           | a : Strong (Cluster found in crops)     | a : Strong (nervous disorders observed)                                                | Very likely |  |
| 2007 | October  | Yes | Stock dove        | 4   | Other than crops (semi-natural area)     | No                                                           | 4 | Yes (Cereals)       | Pool of individuals | - | Crop/gizzard         | 63.0            | -               | No                                              | -                                                       | a : Proved (imidacloprid residues detected in digestive tract)           | b : Low (Cluster but not found in crop) | b : Low (Neither nervous disorders observed nor liver imidacloprid residues detected)  | Possible    |  |
| 2007 | October  | Yes | Pigeon sp.        | 20  | Other than crops (semi-natural area)     | Yes (fall in flight)                                         | 3 | Yes (Cereals)       | Pool of individuals | - | Crop/gizzard         | 86.0            | -               | Yes (alphachloralose)                           | No                                                      | a : Proved (imidacloprid residues detected in digestive tract)           | b : Low (Cluster but not found in crop) | a : Strong (nervous disorders observed)                                                | Likely      |  |
| 2007 | October  | Yes | Partridge sp.     | 6   | Crops (plant growth stage not specified) | No                                                           | 6 | Yes (Not specified) | Pool of individuals | - | Crop/gizzard         | 106.7           | -               | No                                              | -                                                       | a : Proved (imidacloprid residues detected in digestive tract)           | a : Strong (Cluster found in crops)     | b : Low (Neither nervous disorders observed nor liver imidacloprid residues detected)  | Likely      |  |
| 2007 | October  | No  | Pigeon sp.        | 1   | Other than crops (human activity area)   | Yes (nervous disorders)                                      | 1 | Yes (Cereals)       | Individual          | 1 | Crop/gizzard         | 37.0            | -               | No                                              | -                                                       | a : Proved (imidacloprid residues detected in digestive tract)           | b : Low (Single animal incident)        | a : Strong (nervous disorders observed)                                                | Likely      |  |
| 2007 | October  | Yes | Grey partridge    | 2   | Crops (sowing)                           | No                                                           | 2 | Yes (Cereals)       | Pool of individuals | - | Crop/gizzard         | 84.7            | -               | No                                              | -                                                       | a : Proved (imidacloprid residues detected in                            | a : Strong (Cluster found in crops)     | b : Low (Neither nervous disorders observed nor liver imidacloprid                     | Likely      |  |

|      |          |     |                        |    |                                          |                                                      |   |               |                     |   |              |                     |   |                                                        |    |                                                                                           |                                         |                                                                                       |             |
|------|----------|-----|------------------------|----|------------------------------------------|------------------------------------------------------|---|---------------|---------------------|---|--------------|---------------------|---|--------------------------------------------------------|----|-------------------------------------------------------------------------------------------|-----------------------------------------|---------------------------------------------------------------------------------------|-------------|
|      |          |     |                        |    |                                          |                                                      |   |               |                     |   |              |                     |   |                                                        |    | digestive tract)                                                                          |                                         | residues detected)                                                                    |             |
| 2008 | October  | Yes | Pigeon sp.             | 3  | Crops (plant growth stage not specified) | No                                                   | 2 | No            | Pool of individuals | - | Crop/gizzard | 16.1                | - | Yes (alphachloralose)                                  | No | a : Proved (imidacloprid residues detected in digestive tract)                            | a : Strong (Cluster found in crops)     | b : Low (Neither nervous disorders observed nor liver imidacloprid residues detected) | Likely      |
| 2010 | March    | No  | Rock/Feral pigeon      | 1  | Other than crops (human activity area)   | No                                                   | 1 | Yes (Cereals) | Individual          | 1 | Seeds (7.5)  | -                   | - | Yes (anticoagulants)                                   | No | b : Strongly suspected imidacloprid residues detected in seeds found close to the carcass | b : Low (Single animal incident)        | b : Low (Neither nervous disorders observed nor liver imidacloprid residues detected) | Possible    |
| 2010 | March    | Yes | Pigeon sp.             | 7  | Other than crops (semi-natural area)     | No                                                   | 7 | Yes (Cereals) | Pool of individuals | - | Crop/gizzard | 4.5                 | - | No                                                     | -  | a : Proved (imidacloprid residues detected in digestive tract)                            | b : Low (Cluster but not found in crop) | b : Low (Neither nervous disorders observed nor liver imidacloprid residues detected) | Possible    |
| 2010 | March    | No  | Grey partridge         | 1  | Crops (sowing)                           | Yes (ataxia)                                         | 1 | Yes (Beets)   | Individual          | 1 | Crop/gizzard | 120.0               | - | No                                                     | -  | a : Proved (imidacloprid residues detected in digestive tract)                            | b : Low (Single animal incident)        | a : Strong (nervous disorders observed)                                               | Likely      |
| 2010 | June     | No  | Wood-pigeon            | 1  | Crops (plant growth stage not specified) | No                                                   | 1 | No            | Individual          | 1 | Crop/gizzard | 2.4                 | - | Yes (pyrethroids)                                      | No | a : Proved (imidacloprid residues detected in digestive tract)                            | b : Low (Single animal incident)        | b : Low (Neither nervous disorders observed nor liver imidacloprid residues detected) | Possible    |
| 2010 | October  | Yes | Grey partridge         | 6  | Crops (sowing)                           | Yes (ataxia; One bird released safe after few hours) | 1 | No            | Individual          | 1 | Crop/gizzard | 2.5                 | - | Yes (acetylcholinesterase inhibitors; alphachloralose) | No | a : Proved (imidacloprid residues detected in digestive tract)                            | a : Strong (Cluster found in crops)     | a : Strong (nervous disorders observed)                                               | Very likely |
| 2010 | October  | Yes | Wood-pigeon            | 14 | Crops (sowing)                           | No                                                   | 4 | Yes (Cereals) | Pool of individuals | - | Crop/gizzard | 105.0               | - | No                                                     | -  | a : Proved (imidacloprid residues detected in digestive tract)                            | a : Strong (Cluster found in crops)     | b : Low (Neither nervous disorders observed nor liver imidacloprid residues detected) | Likely      |
| 2010 | October  | Yes | Rock/Feral pigeon      | 28 | Crops (sowing)                           | No                                                   | 5 | Yes (Cereals) | Pool of individuals | - | Crop/gizzard | 214.0               | - | Yes (wide-range screening GC-MS)                       | No | a : Proved (imidacloprid residues detected in digestive tract)                            | a : Strong (Cluster found in crops)     | b : Low (Neither nervous disorders observed nor liver imidacloprid residues detected) | Likely      |
| 2010 | October  | Yes | Eurasian collared dove | 20 | Crops (sowing)                           | No                                                   | 3 | No            | Pool of individuals | - | Crop/gizzard | 45.0                | - | Yes (acetylcholinesterase inhibitors; anticoagulants)  | No | a : Proved (imidacloprid residues detected in digestive tract)                            | a : Strong (Cluster found in crops)     | b : Low (Neither nervous disorders observed nor liver imidacloprid residues detected) | Likely      |
| 2010 | October  | Yes | Grey partridge         | 3  | Crops (sowing)                           | No                                                   | 3 | Yes (Cereals) | Individual          | 3 | Crop/gizzard | 105.0 ; 10.0 ; 11.0 | - | Yes (acetylcholinesterase inhibitors)                  | No | a : Proved (imidacloprid residues detected in digestive tract)                            | a : Strong (Cluster found in crops)     | b : Low (Neither nervous disorders observed nor liver imidacloprid residues detected) | Likely      |
| 2010 | November | Yes | Wood-pigeon            | 5  | Crops (sowing)                           | Yes (ataxia)                                         | 2 | Yes (Cereals) | Individual          | 2 | Crop/gizzard | 34.7;45.0           | - | No                                                     | -  | a : Proved (imidacloprid residues detected in digestive tract)                            | a : Strong (Cluster found in crops)     | a : Strong (nervous disorders observed)                                               | Very likely |

|      |          |     |                                             |    |                                          |                                                              |   |                     |                     |   |                      |               |           |                                       |                                |                                                                          |                                         |                                                                                       |             |
|------|----------|-----|---------------------------------------------|----|------------------------------------------|--------------------------------------------------------------|---|---------------------|---------------------|---|----------------------|---------------|-----------|---------------------------------------|--------------------------------|--------------------------------------------------------------------------|-----------------------------------------|---------------------------------------------------------------------------------------|-------------|
| 2011 | February | Yes | Common crane                                | 2  | Crops (plant growth stage not specified) | Yes (apathy)                                                 | 2 | Yes (Cereals)       | Pool of individuals | - | Crop/gizzard         | 4.3           | -         | Yes (acetylcholinesterase inhibitors) | Carbofuran (Crop/gizzard; 247) | a : Proved (imidacloprid residues detected in digestive tract)           | a : Strong (Cluster found in crops)     | b : Low (other pesticides residue detected)                                           | Likely      |
| 2011 | March    | No  | Grey partridge                              | 1  | Crops (plant growth stage not specified) | No                                                           | 1 | No                  | Individual          | 1 | Crop/gizzard & liver | 721.0         | < LoD     | Yes (pyrethroids)                     | No                             | a : Proved (imidacloprid residues detected in digestive tract)           | b : Low (Single animal incident)        | b : Low (Neither nervous disorders observed nor liver imidacloprid residues detected) | Possible    |
| 2011 | October  | Yes | Grey partridge                              | 2  | Crops (plant growth stage not specified) | Yes (nervous disorders)                                      | 2 | Yes (Cereals)       | Individual          | 2 | Crop/gizzard & liver | 1.2 ; 4.5     | < LoD (2) | Yes (acetylcholinesterase inhibitors) | No                             | a : Proved (imidacloprid residues detected in digestive tract)           | a : Strong (Cluster found in crops)     | a : Strong (nervous disorders observed)                                               | Very likely |
| 2011 | October  | Yes | Grey partridge                              | 3  | Crops (sowing)                           | No                                                           | 3 | Yes (Cereals)       | Pool of individuals | - | Crop/gizzard & liver | 113.4         | < LoD     | No                                    | -                              | a : Proved (imidacloprid residues detected in digestive tract)           | a : Strong (Cluster found in crops)     | b : Low (Neither nervous disorders observed nor liver imidacloprid residues detected) | Likely      |
| 2011 | October  | Yes | Pigeon sp. and Fringillidae (not specified) | 3  | Other than crops (human activity area)   | No                                                           | 3 | Yes (Cereals)       | Pool of individuals | - | Crop/gizzard & liver | 52.8          | 1.2       | No                                    | -                              | a : Proved (imidacloprid residues detected in digestive tract and liver) | b : Low (Cluster but not found in crop) | a : Strong (imidacloprid concentration in liver ≥ 1mg/kg)                             | Likely      |
| 2011 | November | No  | Wood-pigeon                                 | 1  | Crops (sowing)                           | No                                                           | 1 | Yes (Cereals)       | Individual          | 1 | Crop/gizzard & liver | 85.3          | < LoD     | No                                    | -                              | a : Proved (imidacloprid residues detected in digestive tract)           | b : Low (Single animal incident)        | b : Low (Neither nervous disorders observed nor liver imidacloprid residues detected) | Possible    |
| 2011 | October  | Yes | Rock/feral pigeon and grey partridge        | 20 | Crops (sowing)                           | Yes (fall in flight)                                         | 3 | Yes (Cereals)       | Pool of individuals | - | Crop/gizzard & liver | 48.0          | 0.8       | No                                    | -                              | a : Proved (imidacloprid residues detected in digestive tract and liver) | a : Strong (Cluster found in crops)     | a : Strong (nervous disorders observed)                                               | Very likely |
| 2011 | October  | Yes | Red-legged and grey partridges              | 2  | Crops (sowing)                           | No                                                           | 2 | Yes (Cereals)       | Pool of individuals | - | Crop/gizzard         | 19.0          | -         | No                                    | -                              | a : Proved (imidacloprid residues detected in digestive tract)           | a : Strong (Cluster found in crops)     | b : Low (Neither nervous disorders observed nor liver imidacloprid residues detected) | Likely      |
| 2011 | November | Yes | Grey partridge                              | 2  | Crops (sowing)                           | Yes (nervous disorders)                                      | 1 | Yes (Not specified) | Individual          | 1 | Crop/gizzard & liver | 53.0          | < LoD     | No                                    | -                              | a : Proved (imidacloprid residues detected in digestive tract)           | a : Strong (Cluster found in crops)     | a : Strong (nervous disorders observed)                                               | Very likely |
| 2011 | October  | Yes | Grey partridge                              | 3  | Crops (sowing)                           | Yes (nervous disorders)                                      | 2 | Yes (Cereals)       | Individual          | 2 | Crop/gizzard         | 27.3 ; 16.5   | -         | No                                    | -                              | a : Proved (imidacloprid residues detected in digestive tract)           | a : Strong (Cluster found in crops)     | a : Strong (nervous disorders observed)                                               | Very likely |
| 2012 | October  | No  | Pigeon sp.                                  | 1  | Crops (sowing)                           | No                                                           | 1 | Yes (Not specified) | Individual          | 1 | Crop/gizzard         | 0.8           | -         | Yes (acetylcholinesterase inhibitors) | Methiocarb (Crop/gizzard; 3.7) | a : Proved (imidacloprid residues detected in digestive tract)           | b : Low (Single animal incident)        | b : Low (other pesticides residue detected)                                           | Possible    |
| 2012 | October  | Yes | Pigeon sp.                                  | 5  | Crops (sowing)                           | Yes (nervous disorders ; Two bird released safe after ~48h ) | 2 | Yes (Not specified) | Individual          | 2 | Crop/gizzard & liver | 131.0 ; 126.0 | < LoD (2) | Yes (acetylcholinesterase inhibitors) | No                             | a : Proved (imidacloprid residues detected in digestive tract)           | a : Strong (Cluster found in crops)     | a : Strong (nervous disorders observed)                                               | Very likely |
| 2012 | November | Yes | Pigeon sp.                                  | 12 | Crops (sowing)                           | Yes (apathy; Seven bird released safe after                  | 2 | Yes (Cereals)       | Individual          | 2 | Crop/gizzard & liver | 90.0 ; 122.0  | 1.6 ; 1.8 | No                                    | -                              | a : Proved (imidacloprid residues detected in digestive tract and liver) | a : Strong (Cluster found in crops)     | a : Strong (nervous disorders observed & imidacloprid concentration in                | Very likely |

|      |           |     |                                  |     |                                          |                         |   |                     |                     |   |                      |                                       |                              |                       |                                          |                                                                                |                                         |                                                                                        |             |
|------|-----------|-----|----------------------------------|-----|------------------------------------------|-------------------------|---|---------------------|---------------------|---|----------------------|---------------------------------------|------------------------------|-----------------------|------------------------------------------|--------------------------------------------------------------------------------|-----------------------------------------|----------------------------------------------------------------------------------------|-------------|
|      |           |     |                                  |     |                                          | ~48h)                   |   |                     |                     |   |                      |                                       |                              |                       |                                          |                                                                                |                                         | liver ≥ 1mg/kg)                                                                        |             |
| 2012 | October   | Yes | Wood-pigeon                      | 10  | Not specified                            | No                      | 1 | Yes (Cereals)       | Individual          | 1 | Crop/gizzard         | Positive                              | -                            | Yes (alphachloralose) | Alphachloralose (Crop/gizzard; positive) | a : Proved (imidacloprid residues detected in digestive tract)                 | b : Low (Cluster but not found in crop) | b : Low (other pesticides residue detected)                                            | Possible    |
| 2012 | October   | Yes | Pigeon sp.                       | 12  | Crops (sowing)                           | Yes (nervous disorders) | 1 | No                  | Individual          | 1 | Crop/gizzard         | 185.0                                 | -                            | No                    | -                                        | a : Proved (imidacloprid residues detected in digestive tract)                 | a : Strong (Cluster found in crops)     | a : Strong (nervous disorders observed)                                                | Very likely |
| 2012 | April     | Yes | Pigeon sp. and black-headed Gull | 4   | Crops (plant growth stage not specified) | No                      | 4 | Yes (Cereals)       | Pool of individuals | - | Crop/gizzard         | 1.4                                   | -                            | Yes (anticoagulants)  | No                                       | a : Proved (imidacloprid residues detected in digestive tract)                 | a : Strong (Cluster found in crops)     | b : Low (Neither nervous disorders observed nor liver imidacloprid residues detected)  | Likely      |
| 2013 | October   | Yes | Pigeon sp.                       | 2   | Other than crops (human activity area)   | Yes (nervous disorders) | 2 | Yes (Cereals)       | Individual          | 2 | Crop/gizzard         | 240.0 ; 61.0                          | -                            | No                    | -                                        | a : Proved (imidacloprid residues detected in digestive tract)                 | b : Low (Cluster but not found in crop) | a : Strong (nervous disorders observed)                                                | Likely      |
| 2013 | September | No  | Pigeon sp.                       | 1   | Not specified                            | No                      | 1 | Yes (Cereals)       | Individual          | 1 | Crop/gizzard         | 119.4                                 | -                            | No                    | -                                        | a : Proved (imidacloprid residues detected in digestive tract)                 | b : Low (Single animal incident)        | b : Low (Neither nervous disorders observed nor liver imidacloprid residues detected)  | Possible    |
| 2013 | October   | Yes | Pigeon sp.                       | 3   | Crops (plant growth stage not specified) | Yes (apathy)            | 3 | Yes (Not specified) | Individual          | 3 | Crop/gizzard         | 195.5 ; 72.2 ; 55.8                   | -                            | No                    | -                                        | a : Proved (imidacloprid residues detected in digestive tract)                 | a : Strong (Cluster found in crops)     | a : Strong (nervous disorders observed)                                                | Very likely |
| 2013 | September | Yes | Rock/Feral pigeon                | 2   | Other than crops (human activity area)   | Yes (fall in flight)    | 2 | Yes (Cereals)       | Pool of individuals | - | Crop/gizzard         | 23.0                                  | -                            | Yes (alphachloralose) | No                                       | a : Proved (imidacloprid residues detected in digestive tract)                 | b : Low (Cluster but not found in crop) | a : Strong (nervous disorders observed)                                                | Likely      |
| 2013 | October   | Yes | Grey partridge                   | 4   | Crops (sowing)                           | No                      | 4 | Yes (Cereals)       | Pool of individuals | - | Crop/gizzard & liver | 132.6                                 | < LoD                        | No                    | -                                        | a : Proved (imidacloprid residues detected in digestive tract)                 | a : Strong (Cluster found in crops)     | b : Low (Neither nervous disorders observed nor liver imidacloprid residues detected)  | Likely      |
| 2013 | December  | Yes | Pigeon sp.                       | 5   | Other than crops (human activity area)   | Yes (nervous disorders) | 5 | Yes (Cereals)       | Pool of individuals | - | Crop/gizzard & liver | 34.0                                  | 11.7                         | No                    | -                                        | a : Proved (imidacloprid residues detected in digestive tract and liver)       | b : Low (Cluster but not found in crop) | a : Strong (nervous disorders observed & imidacloprid concentration in liver ≥ 1mg/kg) | Likely      |
| 2013 | November  | Yes | Pigeon sp.                       | 5   | Other than crops (human activity area)   | Yes (fall in flight)    | 1 | Yes (Not specified) | Individual          | 1 | Not specified (0.46) | -                                     | -                            | No                    | -                                        | b : Strongly suspected imidacloprid residues detected but matrix not specified | b : Low (Cluster but not found in crop) | a : Strong (nervous disorders observed)                                                | Possible    |
| 2013 | October   | Yes | Pigeon sp.                       | 6   | Not specified                            | No                      | 2 | Yes (Cereals)       | Pool of individuals | - | Crop/gizzard         | 73.0                                  | -                            | No                    | -                                        | a : Proved (imidacloprid residues detected in digestive tract)                 | b : Low (Cluster but not found in crop) | b : Low (Neither nervous disorders observed nor liver imidacloprid residues detected)  | Possible    |
| 2013 | October   | Yes | Pigeon sp.                       | 100 | Not specified                            | No                      | 5 | No                  | Individual          | 5 | Crop/gizzard & liver | 189.5 ; 179.0 ; 193.0 ; 206.5 ; 286.7 | 12.5 ; 1.9 ; 0.3 ; 3.1 ; 1.3 | No                    | -                                        | a : Proved (imidacloprid residues detected in digestive tract and liver)       | b : Low (Cluster but not found in crop) | a : Strong (imidacloprid concentration in liver ≥ 1mg/kg)                              | Likely      |



|      |           |     |                                       |    |                                          |                        |   |               |                     |   |                      |               |       |                                             |                                  |                                                                          |                                         |                                                                |             |
|------|-----------|-----|---------------------------------------|----|------------------------------------------|------------------------|---|---------------|---------------------|---|----------------------|---------------|-------|---------------------------------------------|----------------------------------|--------------------------------------------------------------------------|-----------------------------------------|----------------------------------------------------------------|-------------|
| 2014 | October   | Yes | Partridge sp.                         | 2  | Not specified                            | No                     | 2 | Yes (Cereals) | Pool of individuals | - | Crop/gizzard & liver | 71.8          | 6.2   | No                                          | -                                | a : Proved (imidacloprid residues detected in digestive tract and liver) | b : Low (Cluster but not found in crop) | a : Strong (imidacloprid concentration in liver $\geq$ 1mg/kg) | Likely      |
| 2014 | October   | Yes | Grey partridge                        | 5  | Crops (sowing)                           | Yes (fall in flight)   | 1 | Yes (Cereals) | Individual          | 1 | Crop/gizzard         | 58.5          | -     | Yes (anticoagulants; fipronil; pyrethroids) | No                               | a : Proved (imidacloprid residues detected in digestive tract)           | a : Strong (Cluster found in crops)     | a : Strong (nervous disorders observed)                        | Very likely |
| 2014 | October   | Yes | Wood-pigeon                           | 5  | Crops (plant growth stage not specified) | Yes (inability to fly) | 1 | No            | Individual          | 1 | Crop/gizzard & liver | 166.0         | < LoD | No                                          | -                                | a : Proved (imidacloprid residues detected in digestive tract)           | a : Strong (Cluster found in crops)     | a : Strong (nervous disorders observed)                        | Very likely |
| 2014 | September | Yes | Rock/Feral pigeon                     | 7  | Crops (sowing)                           | Yes (apathy)           | 3 | No            | Pool of individuals | - | Crop/gizzard         | 146.0         | -     | Yes (anticoagulants)                        | Bromadiolone (Crop/gizzard; 1.2) | a : Proved (imidacloprid residues detected in digestive tract)           | a : Strong (Cluster found in crops)     | b : Low (other pesticides residue detected)                    | Likely      |
| 2014 | November  | Yes | Rock/Feral pigeon and common starling | 25 | Other than crops (human activity area)   | Yes (apathy)           | 3 | No            | Individual          | 2 | Crop/gizzard         | 215.0 ; 184.0 | -     | No                                          | -                                | a : Proved (imidacloprid residues detected in digestive tract)           | b : Low (Cluster but not found in crop) | a : Strong (nervous disorders observed)                        | Likely      |
